# Supplementary material for: Effect of Docosahexaenoic Acid (DHA) at the Enteric Level in a Synucleinopathy Mouse Model
Source: MDPI journal article supplement (doi:10.3390/nu13124218), 2021-11-24
Supplement: s1 [file s1]

**Table S2.** Primary and secondary antibodies.

| <b>Primary antibodies</b>   | <b>Host</b> | <b>Company</b>          | <b>Catalog #</b> | <b>Dilution</b> |
|-----------------------------|-------------|-------------------------|------------------|-----------------|
| Human $\alpha$ -Synuclein   | Rabbit      | Abcam                   | Ab138501         | 1/250           |
| ChAT                        | Goat        | Millipore               | Ab144P           | 1/100           |
| GFAP                        | Mouse       | Millipore               | MAB360           | 1/500           |
| GLP-1                       | Rabbit      | Invitrogen              | PA5-79303        | 1/750           |
| GPR120                      | Rabbit      | LifeSpan<br>Biosciences | LS-B11842        | 1/100           |
| HuC/HuD                     | Mouse       | Invitrogen              | A-21271          | 1/200           |
| Iba1                        | Rabbit      | Wako                    | 019-19741        | 1/250           |
| MHCII                       | Rat         | BD Pharmingen           | 556999           | 1/500           |
| Nrf2                        | Rabbit      | Abcam                   | Ab62352          | 1/100           |
| TH                          | Sheep       | Abcam                   | Ab113            | 1/200           |
| <b>Secondary antibodies</b> | <b>Host</b> | <b>Company</b>          | <b>Catalog #</b> | <b>Dilution</b> |
| Anti-Goat Alexafluor 488    | Donkey      | Life Technologies       | A11055           | 1/1000          |
| Anti-Mouse Cy3              | Goat        | Life Technologies       | A10521           | 1/1000          |
| Anti-Rabbit Alexafluor 488  | Donkey      | Life Technologies       | A21206           | 1/1000          |
| Anti-Rabbit Alexafluor 555  | Donkey      | Life Technologies       | A31572           | 1/1000          |
| Anti-Rabbit Alexafluor 647  | Donkey      | Life Technologies       | A31573           | 1/1000          |
| Anti-Rat Alexafluor 488     | Donkey      | Life Technologies       | A21208           | 1/1000          |
| Anti-Sheep Alexafluor 488   | Donkey      | Life Technologies       | A11015           | 1/1000          |
| Anti-Sheep Cy3              | Donkey      | Millipore               | AP184C           | 1/800           |
| Anti-Rabbit Alexafluor 647  | Donkey      | Life Technologies       | A31573           | 1/1000          |
