# Supplementary material for: Effect of Docosahexaenoic Acid (DHA) at the Enteric Level in a Synucleinopathy Mouse Model
Source: MDPI journal article supplement (doi:10.3390/nu13124218), 2021-11-24
Supplement: s1 [file s1]

**Table S1.** Description of dietary treatments.

|                                       | <b>Control</b> | <b>Low<br/>DHA</b> | <b>High<br/>DHA</b> |
|---------------------------------------|----------------|--------------------|---------------------|
|                                       | Medium LNA     | Low LNA            | Low LNA             |
|                                       | No DHA         | No DHA             | High DHA            |
| <b>Protein (% w/w)</b>                | 20.3           | 20.3               | 20.3                |
| <b>Carbohydrate (% w/w)</b>           | 66.0           | 66.0               | 66.0                |
| <b>Fat (% w/w)</b>                    | 5.0            | 5.0                | 5.0                 |
| <b>Calorie per diet weight kcal/g</b> | 3.9            | 3.9                | 3.9                 |
| <b>Ingredients (g/kg)</b>             |                |                    |                     |
| Casein                                | 200            | 200                | 200                 |
| DL-Methionine                         | 3              | 3                  | 3                   |
| Corn Starch                           | 150            | 150                | 150                 |
| Sucrose                               | 500            | 500                | 500                 |
| Cellulose, BW200                      | 50             | 50                 | 50                  |
| Corn Oil                              | 30             | 25                 | 10                  |
| Safflower Oil                         | 0              | 25                 | 19                  |
| DHA powder KSF58                      | 0              | 0                  | 50                  |
| Soybean Oil                           | 10             | 0                  | 0                   |
| Canola oil                            | 10             | 0                  | 0                   |
| <b>Fatty acids (g/kg)<sup>1</sup></b> |                |                    |                     |
| Total n-3 PUFA                        | 1.43           | 0.31               | 7.80                |
| LNA                                   | 1.42           | 0.28               | 0.14                |
| EPA                                   | 0              | 0                  | 0.26                |
| DHA                                   | 0              | 0                  | 7.20                |
| Total n-6 PUFA                        | 21.20          | 30.29              | 18.42               |
| Linoleic acid                         | 21.10          | 30.14              | 16.65               |
| Arachidonic acid                      | 0              | 0                  | 0.06                |
| n-6:n-3 PUFA ratio                    | 14.82          | 97.70              | 2.36                |

**Abbreviations and notes:** n-3 and n-6 = n-3 and n-6 polyunsaturated fatty acids (PUFA) DHA: docosahexaenoic acid (22:6n-3) from DHA microencapsulated powder (Martek/DSM) EPA: eicosapentaenoic acid (20:5n-3) This formulation contains 1:25 ratio of to DHA LNA: alpha-linolenic acid (18:2 n-3) (from soybean oil) <sup>1</sup> Determined within the diet by gas chromatography.
