# Supplementary material for: Effect of Docosahexaenoic Acid (DHA) at the Enteric Level in a Synucleinopathy Mouse Model
Source: MDPI journal article supplement (doi:10.3390/nu13124218), 2021-11-24
Supplement: s1 [file s1]

**Table S3.** Specific mass transitions of endocannabinoids and related mediators.

| Lipid        | Internal Standard Used | Q1 → Q3         | Retention Time (min) |
|--------------|------------------------|-----------------|----------------------|
| LEA-d4       | -                      | 328.20 → 66.10  | 11.48                |
| LEA          | LEA-d4-                | 324.30 → 62.05  | 11.53                |
| DHEA-d4      |                        | 376.30 → 66.0   | 11.62                |
| DHEA         | DHEA-d4                | 372.20 → 62.20  | 11.67                |
| DPEA(n-3)    | DHEA-d4                | 374.0 → 62.2    | 12.50                |
| DPEA(n-6)    | DHEA-d4                | 374.2 → 62.1    | 12.30                |
| AEA-d4       |                        | 352.10 → 66.20  | 11.64                |
| AEA          | AEA-d4                 | 348.30 → 333.20 | 11.69                |
| PEA-d4       |                        | 304.00 → 62.30  | 12.01                |
| PEA          | PEA-d4                 | 300.30 → 62.10  | 12.04                |
| OEA-d4       |                        | 330.20 → 66.10  | 12.61                |
| OEA          | OEA-d4                 | 326.00 → 62.05  | 12.63                |
| SEA-d3       |                        | 331.10 → 62.30  | 13.35                |
| SEA          | SEA-d3                 | 328.00 → 62.10  | 13.64                |
| 1-AG-d5      |                        | 384.50 → 287.20 | 12.64                |
| 1/2-AG       | 1-AG-d5                | 379.30 → 287.25 | 12.54                |
| 1/2-OG       | 1-AG-d5                | 357.20 → 264.10 | 13.27                |
| 1/2-SDG      | 1-AG-d5                | 351.2 → 259.2   | 10.10                |
| 1-LG-d5      |                        | 360.00 → 263.30 | 12.63                |
| 1/2-LG       | 1-LG-d5                | 355.20 → 263.30 | 12.50                |
| 1-EPG-d5     |                        | 382.20 → 285.25 | 11.67                |
| 1/2-EPG      | 1-EPG-d5               | 377.10 → 285.25 | 11.66                |
| 1-DHG-d5     |                        | 408.2 → 311.20  | 12.52                |
| 1/2-DHG      | 1-DHG-d5               | 403.20 → 311.20 | 12.50                |
| 1-DPG-d5     |                        | 410.3 → 313.3   | 12.80                |
| 1/2-DPG(n-3) | 1-DPG-d5               | 405.2 → 313.3   | 12.60                |

**Abbreviations:** AEA, anandamide; AG, arachidonoyl glycerol; DHEA, docosaheptaenoyl ethanolamide; DHG, docosaheptaenoyl glycerol; DPEA, docosapentaenoyl ethanolamide; DPG, dipalmitoyl glycerol; EPG, eicosapentaenoyl glycerol; LEA, linoleoyl ethanolamide; LG, linoleoyl glycerol; OEA, oleoyl ethanolamide; OG, oleoyl glycerol; PEA,

palmitoyl ethanolamide; SEA, stearoyl ethanolamine; SDG, 1-stearoyl-2-docosahexaenoyl glycerol.
