# Supplementary material for: Effect of Docosahexaenoic Acid (DHA) at the Enteric Level in a Synucleinopathy Mouse Model
Source: Nutrients. 2021 Nov 24;13(12):4218. doi: 10.3390/nu13124218 (PMC8703327; doi:10.3390/nu13124218)
Supplement: Supplementary file 1 [file nutrients-13-04218-s001.zip]

Archive with 4 entries (4 files):
- FiguresSuppl.pdf
- TableS1-DietaryTreatments.pdf
- TableS2Antibodies.pdf
- TableS3MassTransitionECB.pdf
